# Supplementary material for: Association of Serum Levels and Immunohistochemical Labelling of Des-Gamma-Carboxy-Prothrombin in Patients Undergoing Liver Transplantation for Hepatocellular Carcinoma
Source: MDPI journal article supplement (doi:10.3390/diagnostics14090894), 2024-04-25
Supplement: s1 [file s1]

**Supplementary Table S1. Characteristics of liver transplant recipients per intensity of des-γ-carboxy prothrombin labelling of hepatocellular carcinoma.<sup>a</sup>**

|                                  | Whole population<br>(n=39) | Negative<br>labelling (n=13) | Focally positive<br>labelling (n=7) | Diffusely positive<br>labelling (n=19) | p <sup>b</sup> |
|----------------------------------|----------------------------|------------------------------|-------------------------------------|----------------------------------------|----------------|
|                                  | Medians (IQR) or n (%)     |                              |                                     |                                        |                |
| Lab panel at LT                  |                            |                              |                                     |                                        |                |
| Albumin (g/l)                    | 37 (31-44)                 | 44 (38-46)                   | 36 (29-42)                          | 36 (31-39)                             | 0.060          |
| Platelets (*10 <sup>3</sup> /ml) | 106 (72-151)               | 100 (88-118)                 | 124 (86-165)                        | 112 (60-166)                           | 0.638          |
| Total bilirubin (mg/dl)          | 1.0 (0.7-2.3)              | 0.8 (0.5-2.0)                | 1.0 (0.6-3.8)                       | 1.1 (0.9-2.3)                          | 0.502          |
| AST (U/l)                        | 42 (31-77)                 | 37 (28-61)                   | 39 (32-70)                          | 45 (37-81)                             | 0.288          |
| ALT (U/l)                        | 33 (22-45)                 | 36 (27-44)                   | 31 (24-35)                          | 28 (22-64)                             | 0.808          |
| INR                              | 1.23 (1.09-1.39)           | 1.13 (1.06-1.27)             | 1.14 (1.09-1.76)                    | 1.30 (1.13-1.60)                       | 0.097          |
| Creatinine (mg/dl)               | 0.83 (0.72-1.09)           | 0.73 (0.64-0.99)             | 1.10 (0.83-1.16)                    | 0.81 (0.74-1.06)                       | 0.053          |
| Donor                            |                            |                              |                                     |                                        |                |
| DBD                              | 26 (66.7)                  | 7 (53.8)                     | 5 (71.4)                            | 14 (73.7)                              | 0.483          |
| DCD                              | 10 (25.6)                  | 6 (46.2)                     | 1 (14.3)                            | 3 (15.8)                               | 0.116          |
| LD                               | 2 (5.1)                    | 0 (0.0)                      | 1 (14.3)                            | 1 (5.3)                                | 0.385          |
| CIT (minutes)                    | 463 (398-544)              | 415 (404-531)                | 537 (463-556)                       | 479 (380-540)                          | 0.427          |

<sup>a</sup> Patients are classified according to the most intense labelling; <sup>b</sup> Kruskal-Wallis tests for quantitative variables and X<sup>2</sup> tests for nominal variables. Abbreviations: CIT, cold ischaemia time; DBD, donor after brain death; DCD, donor after cardiac death; IQR, interquartile range; LD, live donor; LT, liver transplantation
